# Supplementary material
Source: PubMed Central journal article supplement (PMC4761832)
Supplement: Supp_Fig2.pdf [file Supp_Fig2.pdf]

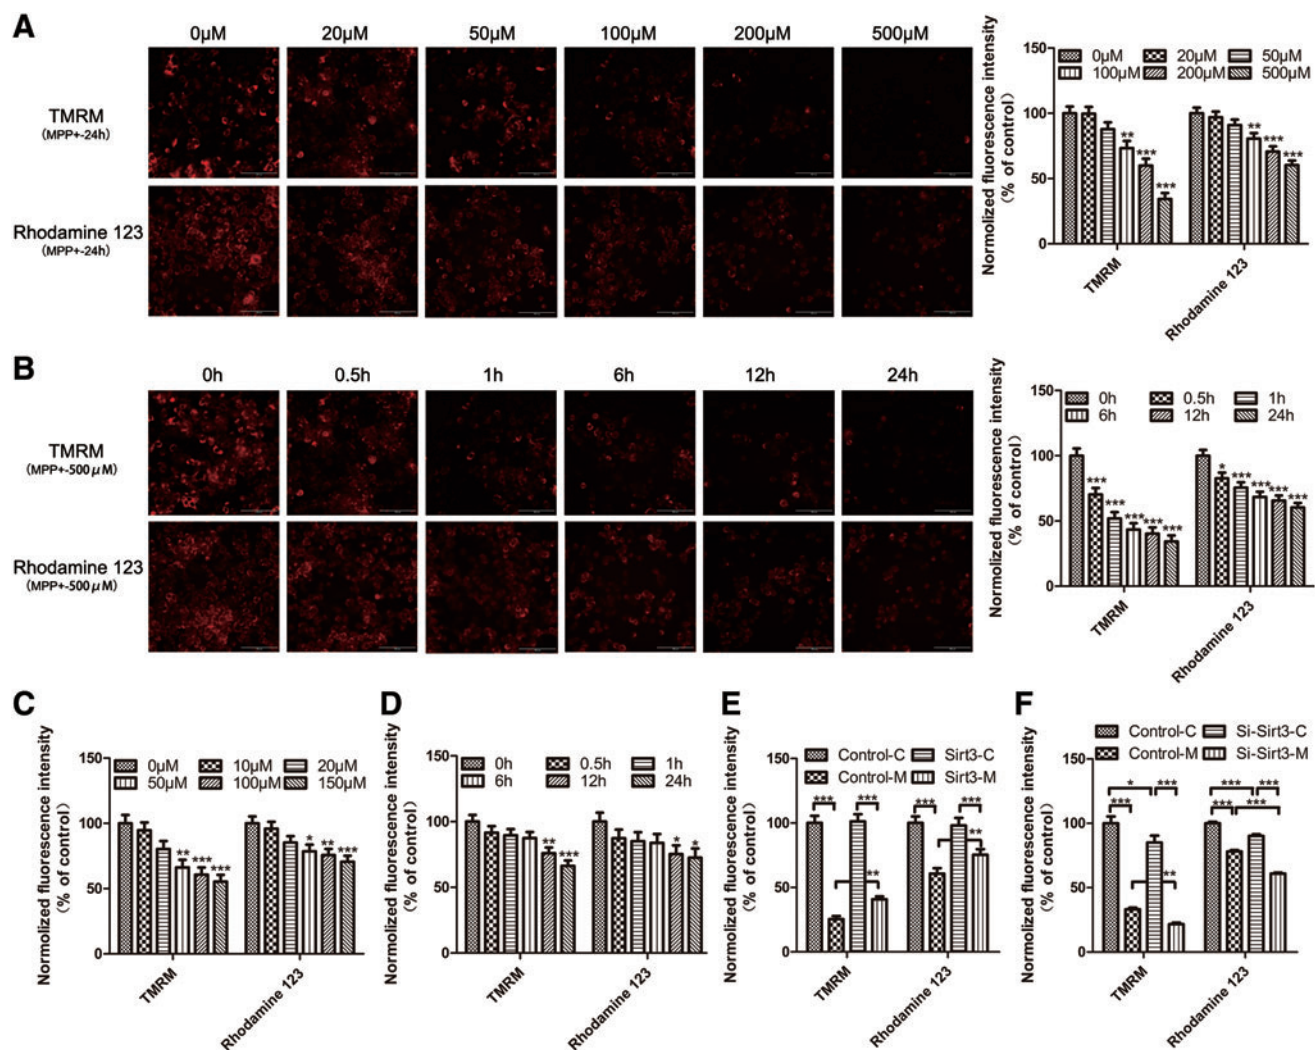

**SUPPLEMENTARY FIG. S2. Sirt3 protects against MPP<sup>+</sup>-induced mitochondrial membrane potential reduction.** The mitochondrial membrane potential was measured with Rhodamine 123 and TMRM in N-2a cells under different concentrations of MPP<sup>+</sup> for 24 h (A) and with 500  $\mu$ M MPP<sup>+</sup> for different times (B), and in mouse primary midbrain neurons under different concentrations of MPP<sup>+</sup> for 24 h (C) and with 50  $\mu$ M MPP<sup>+</sup> for different times (D). Quantitative data = mean  $\pm$  SEM,  $n = 3$ , \* $p < 0.05$ ; \*\* $p < 0.01$ ; \*\*\* $p < 0.001$ , ANOVA with Dunnett test. The mitochondrial membrane potential was measured in N-2a cells under MPP<sup>+</sup> treatment with Sirt3 overexpression (E) or knockdown (F). Quantitative data = mean  $\pm$  SEM,  $n = 3$ , \* $p < 0.05$ ; \*\* $p < 0.01$ ; \*\*\* $p < 0.001$ , ANOVA with Newman-Keuls test.
