# Supplementary material
Source: PubMed Central journal article supplement (PMC4761832)
Supplement: Supp_Fig3.pdf [file Supp_Fig3.pdf]

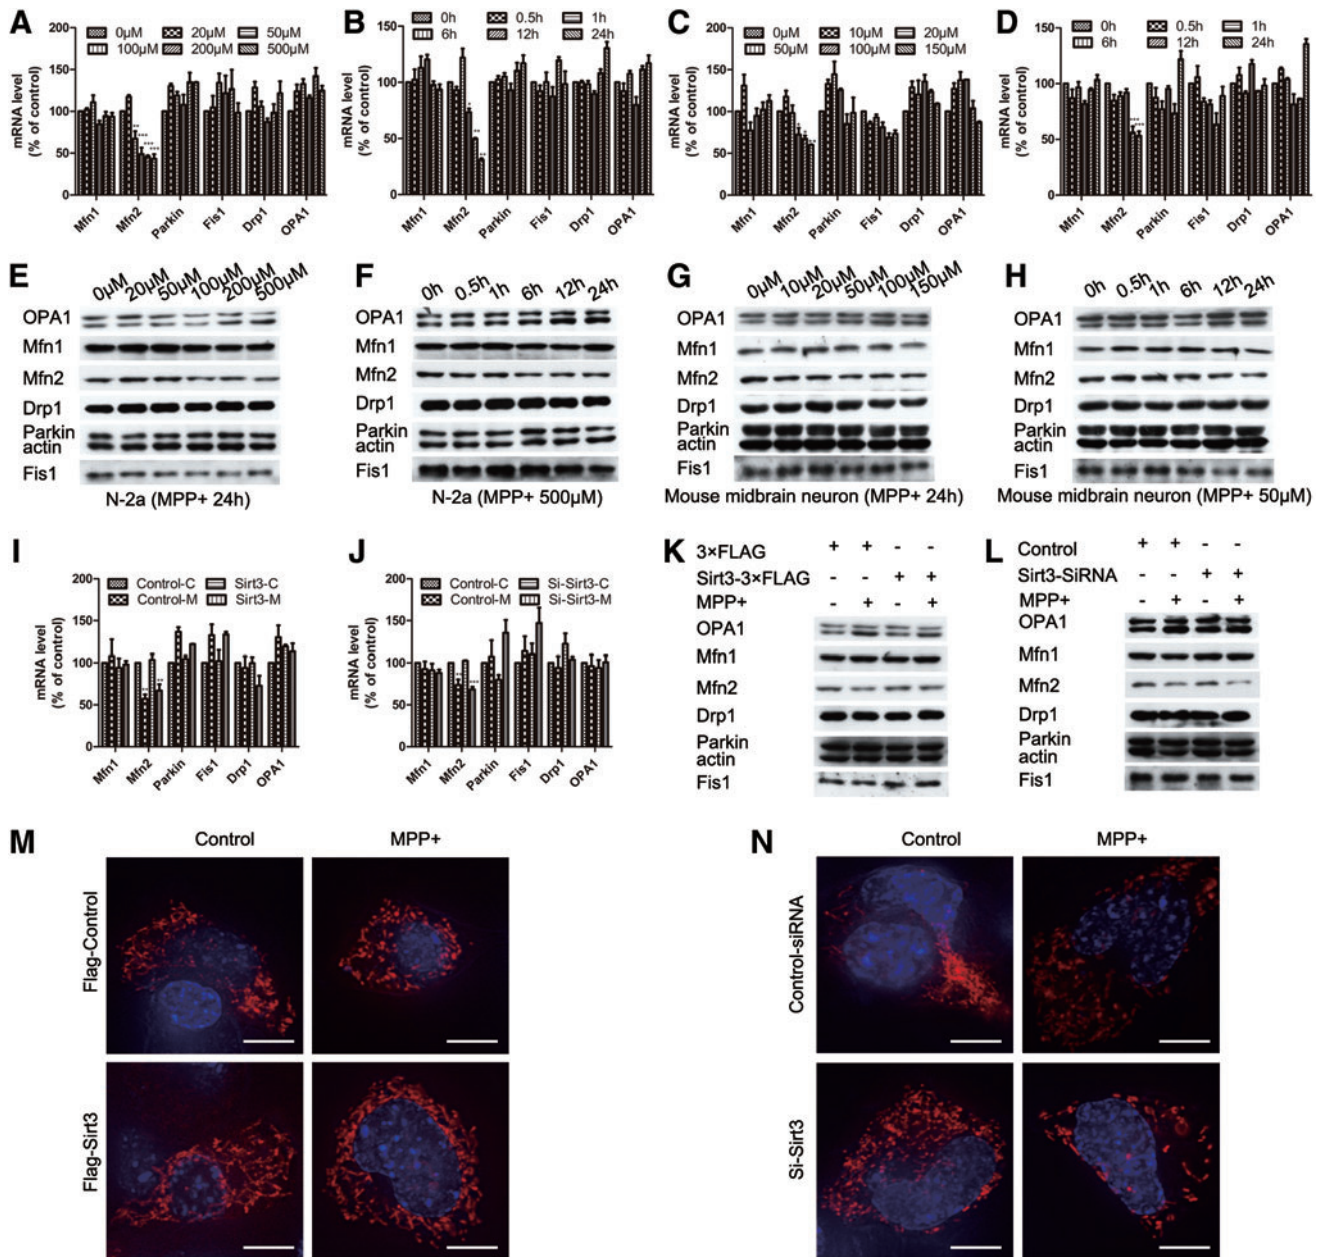

**SUPPLEMENTARY FIG. S3. Sirt3 protects against MPP<sup>+</sup>-induced mitochondrial fusion process inhibition.** The mRNA levels of mitochondrial fusion/fission proteins (Mfn1, Mfn2, Parkin, Drp1, Fis1, OPA1) were measured by qPCR in N-2a cells under different concentrations of MPP<sup>+</sup> for 24 h (A) and with 500  $\mu$ M MPP<sup>+</sup> for different times (B), and in mouse primary midbrain neurons under different concentrations of MPP<sup>+</sup> for 24 h (C) and with 50  $\mu$ M MPP<sup>+</sup> for different times (D). Quantitative data = mean  $\pm$  SEM,  $n = 3$ , \* $p < 0.05$ ; \*\* $p < 0.01$ ; \*\*\* $p < 0.001$ , ANOVA with Dunnett test. The protein levels of mitochondrial fusion/fission proteins (Mfn1, Mfn2, Parkin, Drp1, Fis1, OPA1) were measured by Western blotting in N-2a cells under different concentrations of MPP<sup>+</sup> for 24 h (E) and with 500  $\mu$ M MPP<sup>+</sup> for different times (F), and in mouse primary midbrain neurons under different concentrations of MPP<sup>+</sup> for 24 h (G) and with 50  $\mu$ M MPP<sup>+</sup> for different times (H). The mRNA levels of mitochondrial fusion/fission proteins (Mfn1, Mfn2, Parkin, Drp1, Fis1, OPA1) were measured in N-2a cells with Sirt3 overexpression (I) or knockdown (J). Quantitative data = mean  $\pm$  SEM,  $n = 3$ , \*\* $p < 0.01$ ; \*\*\* $p < 0.001$ , ANOVA with Newman-Keuls test. The protein levels of mitochondrial fusion/fission proteins (Mfn1, Mfn2, Parkin, Drp1, Fis1, OPA1) were measured in N-2a cells with Sirt3 overexpression (K) or knockdown (L). The mitochondrial fusion/fission process was measured by live cell imaging in N-2a cells transfected with pDsRed-mito under MPP<sup>+</sup> treatment with Sirt3 overexpression (M) or knockdown (N). qPCR, quantitative real-time polymerase chain reaction.
