# Supplementary material
Source: PubMed Central journal article supplement (PMC4761832)
Supplement: Supp_Fig4.pdf [file Supp_Fig4.pdf]

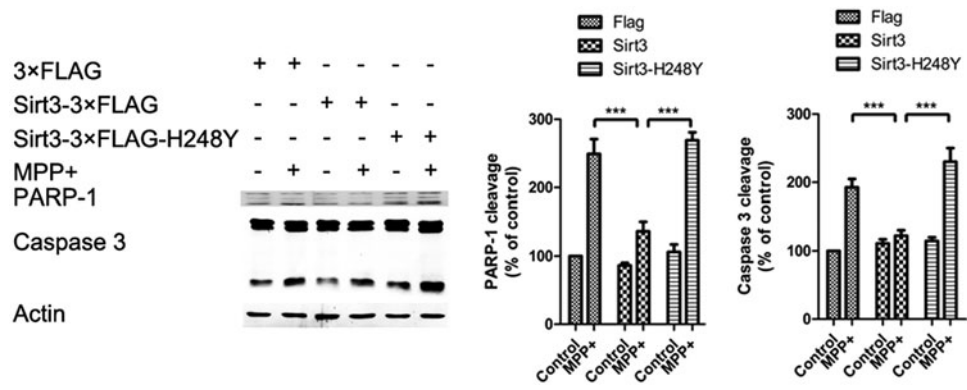

**SUPPLEMENTARY FIG. S4. Sirt3 deacetylase-deficient mutant (H248Y) eliminated the neuroprotective effects of Sirt3.** Sirt3-3×FLAG, 3×FLAG vector, or Sirt3-H248Y-3×FLAG was transfected into mouse primary midbrain neurons treated with 50  $\mu$ M MPP+. PARP-1 and caspase 3 were measured by Western blotting. Quantitative data = mean  $\pm$  SEM,  $n=3$ , \*\*\* $p < 0.001$ , ANOVA with Newman-Keuls test.
