# Supplementary material
Source: PubMed Central journal article supplement (PMC4761832)
Supplement: Supp_Fig5.pdf [file Supp_Fig5.pdf]

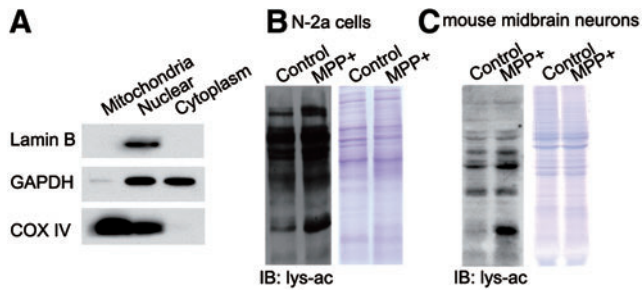

**SUPPLEMENTARY FIG. S5. MPP+ treatment increases acetylation level in mitochondrial proteins.** (A) The Lamin B (nuclear control), GAPDH (cytoplasmic control), and COX IV (mitochondrial control) were measured to determine the purity of mitochondria. The acetylation level of mitochondrial proteins was measured by Western blotting after mitochondrial isolation from N-2a cells (B) or mouse primary midbrain neurons (C) under MPP+ treatment. The protein gel was a loading control.
