# Supplementary material
Source: PubMed Central journal article supplement (PMC4761832)
Supplement: Supp_Fig6.pdf [file Supp_Fig6.pdf]

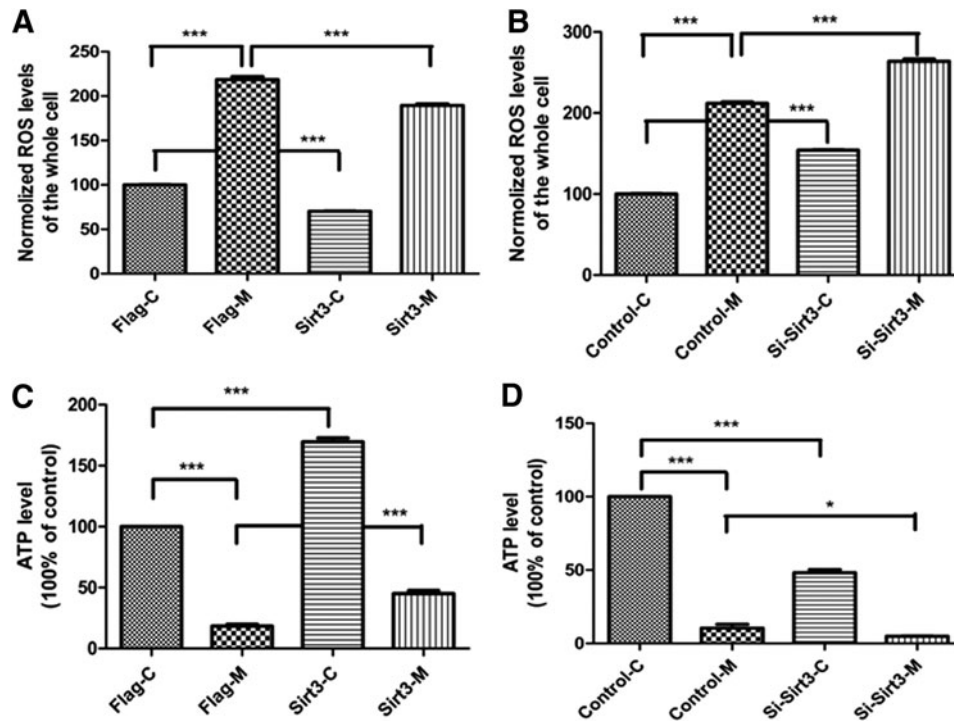

**SUPPLEMENTARY FIG. S6. Sirt3 protects against MPP<sup>+</sup>-induced ROS accumulation and ATP depletion in N-2a cells.** (A) ROS were measured in N-2a cells transfected with Sirt3-3×FLAG or 3×FLAG vector and treated with 500  $\mu$ M MPP<sup>+</sup> for 24 h. (B) ROS were measured in N-2a cells transfected with Sirt3 siRNA or control siRNA and treated with 500  $\mu$ M MPP<sup>+</sup> for 24 h. (C) ATP was measured in N-2a cells transfected with Sirt3-3×FLAG or 3×FLAG vector and treated with 500  $\mu$ M MPP<sup>+</sup> for 24 h. (D) ATP was measured in N-2a cells transfected with Sirt3 siRNA or control siRNA and treated with 500  $\mu$ M MPP<sup>+</sup> for 24 h. Quantitative data = mean  $\pm$  SEM,  $n = 3$ , \* $p < 0.05$ ; \*\*\* $p < 0.001$ , ANOVA with Newman–Keuls test.
