# Supplementary material
Source: PubMed Central journal article supplement (PMC4761832)
Supplement: Supp_Fig7.pdf [file Supp_Fig7.pdf]

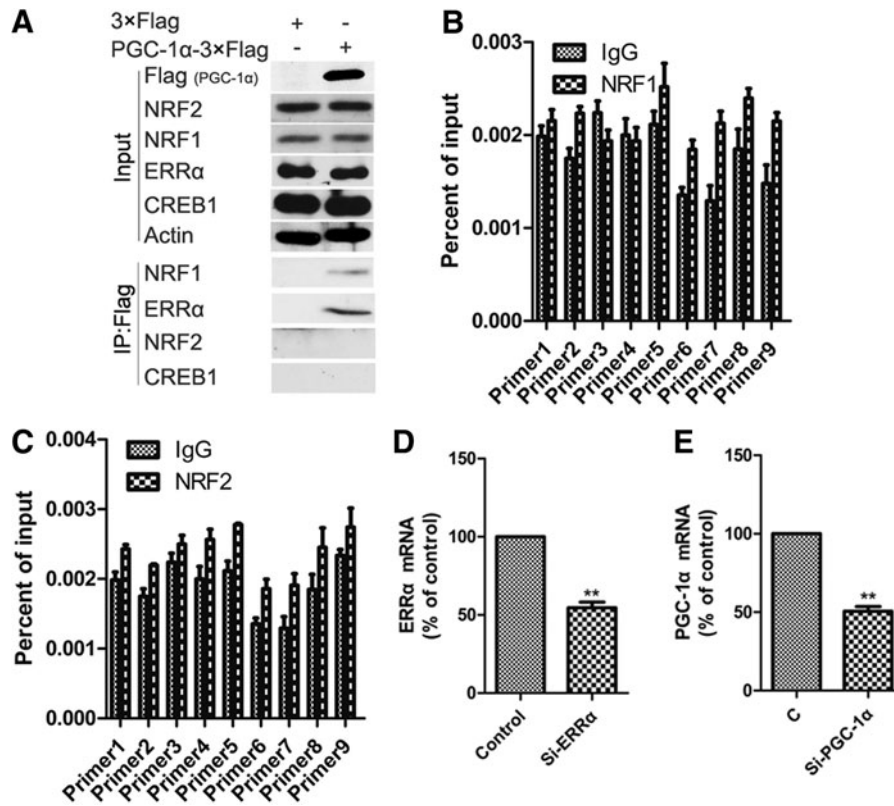

**SUPPLEMENTARY FIG. S7. PGC-1 $\alpha$  interacts with ERR $\alpha$  and NRF1 and NRF1/2 have little binding in the Sirt3 promoter.** (A) PGC-1 $\alpha$ -3xFLAG was transfected into N-2a cells and immunoprecipitated, followed by Western blotting with ERR $\alpha$ , NRF1, NRF2, and CREB1. Only ERR $\alpha$  and NRF1 were found to have interaction with PGC-1 $\alpha$ . ChIP-qPCR was performed with NRF1 (B) and NRF2 (C) antibodies in N-2a cells. The mRNA levels of ERR $\alpha$  (D) and PGC-1 $\alpha$  (E) were measured in N-2a cells transfected with their siRNA. Quantitative data = mean  $\pm$  SEM,  $n = 3$ , \*\* $p < 0.01$ ; compared with control group, paired two-tailed Student's  $t$  test. ChIP, chromatin immunoprecipitation; ERR $\alpha$ , estrogen-related receptor alpha; NRF1, nuclear respiratory factor 1; NRF2, nuclear factor erythroid 2 (NF-E2)-related factor 2; PGC-1 $\alpha$ , peroxisome proliferator-activated receptor- $\gamma$  coactivator 1 $\alpha$ .
