# Supplementary material
Source: PubMed Central journal article supplement (PMC4761832)
Supplement: Supp_Fig8.pdf [file Supp_Fig8.pdf]

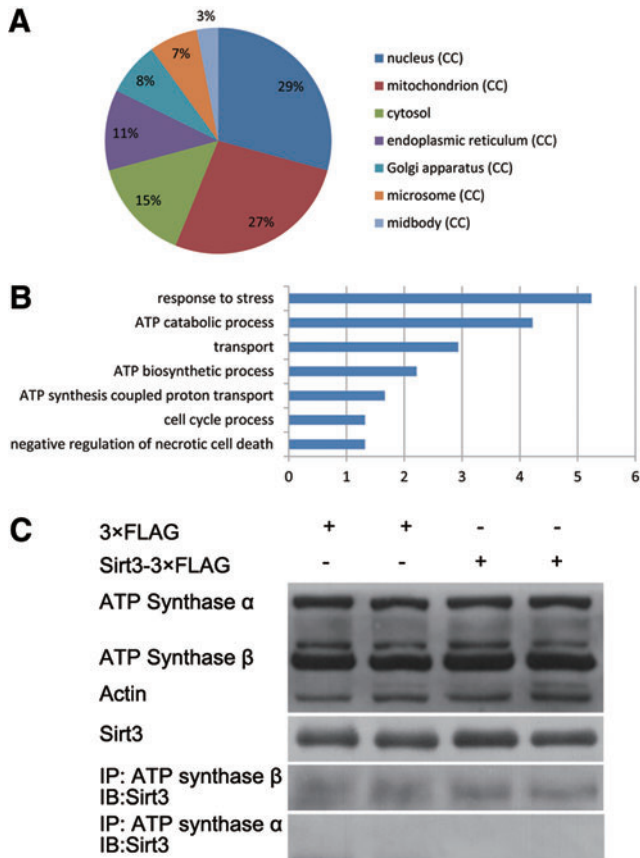

**SUPPLEMENTARY FIG. S8. The cellular localization and biological process analysis of the identified proteins from the immunoprecipitation complex of Sirt3.** (A) The cellular localization analysis of the identified proteins. (B) The biological process analysis of the identified proteins. (C) Endogenous ATP synthase  $\alpha$  or ATP synthase  $\beta$  was immunopurified from N-2a cells, followed by Western blotting with Sirt3 antibody. Only the endogenous ATP synthase  $\beta$  has interaction with Sirt3.
