# Supplementary material
Source: PubMed Central journal article supplement (PMC4761832)
Supplement: Supp_Table1.pdf [file Supp_Table1.pdf]

## Supplementary Data

SUPPLEMENTARY TABLE S1. PROTEINS IDENTIFIED FROM THE IMMUNOPRECIPITATION COMPLEX OF SIRT3

| <i>Accession</i>  | <i>#AAs</i> | <i>MW [kDa]</i> | <i>Calc. pI</i> | <i>Description</i>                             |
|-------------------|-------------|-----------------|-----------------|------------------------------------------------|
| IPI:IPI00110850.1 | 375         | 41.7            | 5.48            | Actin                                          |
| IPI:IPI00130280.1 | 553         | 59.7            | 9.19            | ATP synthase subunit beta                      |
| IPI:IPI00319992.1 | 655         | 72.4            | 5.16            | 78 kDa glucose-regulated protein               |
| IPI:IPI00308885.6 | 573         | 60.9            | 6.18            | Isoform 1 of 60 kDa heat shock protein         |
| IPI:IPI00468481.2 | 529         | 56.3            | 5.34            | ATP synthase subunit alpha                     |
| IPI:IPI00407339.7 | 103         | 11.4            | 11.36           | Histone H4                                     |
| IPI:IPI00138691.6 | 168         | 19.7            | 8.43            | Actin-related protein 2/3 complex subunit 4    |
| IPI:IPI00229544.3 | 128         | 13.9            | 11.03           | Histone H2A type 1-H                           |
| IPI:IPI00403810.2 | 449         | 49.9            | 5.10            | Tubulin alpha-1C chain                         |
| IPI:IPI00110753.1 | 451         | 50.1            | 5.06            | Tubulin alpha-1A chain                         |
| IPI:IPI00117348.4 | 451         | 50.1            | 5.06            | Tubulin alpha-1B chain                         |
| IPI:IPI00230108.6 | 505         | 56.6            | 6.21            | Protein disulfide-isomerase A3                 |
| IPI:IPI00114642.4 | 126         | 13.9            | 10.32           | Histone H2B type 1-F/J/L                       |
| IPI:IPI00227930.3 | 126         | 13.9            | 10.32           | Histone H2B type 1-H                           |
| IPI:IPI00129526.1 | 802         | 92.4            | 4.82            | Endoplasmic                                    |
| IPI:IPI01027670.1 | 37          | 4.5             | 10.40           | 5 kDa protein                                  |
| IPI:IPI00467441.3 | 234         | 26.1            | 5.95            | BTB/POZ domain-containing protein KCTD5        |
| IPI:IPI00133522.2 | 509         | 57.0            | 4.88            | Protein disulfide-isomerase                    |
| IPI:IPI00115627.4 | 418         | 47.3            | 5.88            | Actin-related protein 3                        |
| IPI:IPI00129430.1 | 699         | 75.4            | 9.44            | Splicing factor, proline- and glutamine-rich   |
| IPI:IPI00323357.3 | 646         | 70.8            | 5.52            | Heat shock cognate 71 kDa protein              |
| IPI:IPI00117352.1 | 444         | 49.6            | 4.89            | Tubulin beta-5 chain                           |
| IPI:IPI00987238.1 | 96          | 10.8            | 5.14            | Protein S100-A11-like                          |
| IPI:IPI00123639.1 | 416         | 48.0            | 4.49            | Calreticulin                                   |
| IPI:IPI00850020.1 | 219         | 24.1            | 7.33            | If kappa light chain (Fragment)                |
| IPI:IPI00127841.3 | 298         | 32.9            | 9.73            | ADP/ATP translocase 2                          |
| IPI:IPI00986015.1 | 432         | 47.2            | 6.71            | Protein disulfide-isomerase A6-like            |
| IPI:IPI01027291.1 | 94          | 10.7            | 6.51            | 11 kDa protein                                 |
| IPI:IPI00459493.5 | 556         | 60.4            | 6.16            | Isoform 1 of T-complex protein 1 subunit alpha |
| IPI:IPI00119478.1 | 352         | 39.5            | 5.14            | Tropomodulin-3                                 |
| IPI:IPI00759948.1 | 731         | 80.7            | 5.76            | Isoform 2 of Gelsolin                          |
| IPI:IPI00875408.1 | 263         | 28.6            | 5.29            | BTB/POZ domain-containing protein KCTD2        |
| IPI:IPI00454008.1 | 504         | 55.7            | 8.46            | Serine hydroxymethyltransferase                |
| IPI:IPI00229845.3 | 637         | 72.6            | 6.42            | Protein arginine N-methyltransferase 5         |
| IPI:IPI00466069.3 | 858         | 95.3            | 6.83            | Elongation factor 2                            |
| IPI:IPI00320217.9 | 535         | 57.4            | 6.40            | T-complex protein 1 subunit beta               |
| IPI:IPI00987580.1 | 164         | 18.0            | 6.68            | Peptidyl-prolyl <i>cis-trans</i> isomerase     |
| IPI:IPI00222546.5 | 128         | 14.7            | 9.19            | 60S ribosomal protein L22                      |
| IPI:IPI00123181.4 | 1960        | 226.2           | 5.66            | Myosin-9                                       |
| IPI:IPI00222228.5 | 538         | 58.2            | 8.25            | Hypothetical protein                           |
| IPI:IPI00968349.1 | 334         | 36.6            | 7.44            | NAD-dependent deacetylase sirtuin-3 isoform 3  |
| IPI:IPI00462232.3 | 146         | 16.1            | 4.96            | Myosin light polypeptide 6-like                |
| IPI:IPI00124820.2 | 474         | 53.1            | 7.08            | Coronin-1C                                     |
| IPI:IPI00117705.2 | 441         | 49.0            | 5.83            | Protein glycosyltransferase 48 kDa subunit     |
| IPI:IPI00130391.1 | 246         | 26.1            | 4.94            | Protease, serine, 1                            |
| IPI:IPI00113427.3 | 148         | 16.8            | 9.41            | Lysozyme C-1                                   |
| IPI:IPI00169870.6 | 617         | 71.0            | 7.28            | Procollagen galactosyltransferase              |
| IPI:IPI01027176.1 | 509         | 54.8            | 8.02            | 55 kDa protein                                 |
| IPI:IPI00115564.5 | 298         | 32.9            | 9.72            | ADP/ATP translocase 1                          |
| IPI:IPI00554929.3 | 724         | 83.2            | 5.03            | Heat shock protein HSP 90-beta                 |
| IPI:IPI00225961.5 | 533         | 56.5            | 6.54            | D-3-phosphoglycerate dehydrogenase             |
| IPI:IPI00830215.1 | 324         | 35.7            | 7.40            | Ig gamma-1 chain C region secreted form        |
| IPI:IPI00831369.1 | 2092        | 244.1           | 5.44            | MKIAA4049 protein                              |
| IPI:IPI00124771.1 | 357         | 39.6            | 9.26            | Phosphate carrier protein                      |
| IPI:IPI00469268.5 | 548         | 59.5            | 5.62            | T-complex protein 1 subunit theta              |
| IPI:IPI00223713.5 | 212         | 21.3            | 11.00           | Histone H1.2                                   |
| IPI:IPI00224518.2 | 216         | 23.4            | 8.41            | Ras-related protein Rab-5C                     |

(continued)

SUPPLEMENTARY TABLE S1 (CONTINUED)

| <i>Accession</i>  | <i>#AAs</i> | <i>MW [kDa]</i> | <i>Calc. pI</i> | <i>Description</i>                                                                                             |
|-------------------|-------------|-----------------|-----------------|----------------------------------------------------------------------------------------------------------------|
| IPI:IPI00318841.4 | 437         | 50.0            | 6.74            | Elongation factor 1-gamma                                                                                      |
| IPI:IPI00798571.2 | 929         | 103.1           | 8.02            | Isoform 2 of SCY1-like protein 2                                                                               |
| IPI:IPI00229475.1 | 745         | 81.7            | 6.14            | Junction plakoglobin                                                                                           |
| IPI:IPI00119618.1 | 591         | 67.2            | 4.64            | Calnexin                                                                                                       |
| IPI:IPI00808433.1 | 260         | 29.5            | 6.02            | Isoform 2 of Fatty acyl-CoA reductase 1                                                                        |
| IPI:IPI00331516.4 | 660         | 72.4            | 4.44            | Isoform E2 of Drebrin                                                                                          |
| IPI:IPI00114819.3 | 342         | 36.9            | 5.27            | Methylosome protein 50                                                                                         |
| IPI:IPI00131674.3 | 247         | 26.4            | 7.93            | Trypsinogen 7                                                                                                  |
| IPI:IPI00130920.2 | 2464        | 270.1           | 4.83            | Microtubule-associated protein 1B                                                                              |
| IPI:IPI00131695.3 | 608         | 68.6            | 6.07            | Serum albumin                                                                                                  |
| IPI:IPI00309035.2 | 608         | 68.5            | 6.46            | Protein glycosyltransferase subunit 1                                                                          |
| IPI:IPI00515398.1 | 1976        | 228.9           | 5.54            | Myosin-10                                                                                                      |
| IPI:IPI00845858.1 | 201         | 22.2            | 6.96            | Isoform 2 of dihydrolipoyllysine-residue succinyltransferase component of 2-oxoglutarate dehydrogenase complex |
| IPI:IPI00127406.1 | 741         | 84.9            | 6.23            | Procollagen-lysine,2-oxoglutarate 5-dioxygenase 3                                                              |
| IPI:IPI00320850.3 | 717         | 79.3            | 7.83            | Methylcrotonoyl-CoA carboxylase subunit alpha                                                                  |
| IPI:IPI00119020.1 | 222         | 25.1            | 5.97            | Charged multivesicular body protein 2a                                                                         |
| IPI:IPI00126943.1 | 465         | 54.1            | 7.34            | Serine/threonine-protein kinase 38                                                                             |
| IPI:IPI00918500.1 | 737         | 84.4            | 6.89            | Procollagen-lysine,2-oxoglutarate 5-dioxygenase 2                                                              |
| IPI:IPI00317289.8 | 460         | 52.2            | 7.69            | Isoform 2 of dynactin subunit 4                                                                                |
| IPI:IPI00875833.2 | 977         | 105.7           | 7.02            | Monofunctional C1-tetrahydrofolate synthase                                                                    |
| IPI:IPI00227865.1 | 1938        | 223.1           | 5.47            | Isoform 2 of myosin-11                                                                                         |
| IPI:IPI00754386.4 | 464         | 54.1            | 6.54            | ERO1-like protein alpha                                                                                        |
| IPI:IPI00944068.1 | 580         | 64.6            | 5.64            | Peptidyl-prolyl <i>cis-trans</i> isomerase FKBP10 isoform 2                                                    |
| IPI:IPI00381682.1 | 313         | 34.9            | 9.35            | Solute carrier family 35 member E3                                                                             |
| IPI:IPI00119581.2 | 327         | 34.3            | 10.24           | rRNA 2'-O-methyltransferase fibrillar                                                                          |
| IPI:IPI00750260.1 | 1174        | 126.4           | 4.65            | Isoform 2 of fibulin-2                                                                                         |
| IPI:IPI00753815.3 | 2472        | 284.4           | 5.33            | Isoform 1 of spectrin alpha chain                                                                              |
| IPI:IPI00307837.6 | 462         | 50.1            | 9.01            | Elongation factor 1-alpha 1                                                                                    |
| IPI:IPI00380009.2 | 699         | 78.1            | 6.90            | Isoform 3 of SUN domain-containing protein 2                                                                   |
| IPI:IPI00387580.2 | 674         | 75.4            | 6.34            | Isoform 1 of gamma-adducin                                                                                     |
| IPI:IPI00124111.1 | 728         | 80.8            | 8.91            | Plakophilin-1                                                                                                  |
| IPI:IPI00135996.5 | 587         | 67.7            | 6.23            | Protein POF1B                                                                                                  |
| IPI:IPI00323881.2 | 876         | 97.1            | 4.78            | Importin subunit beta-1                                                                                        |
| IPI:IPI00464208.3 | 512         | 57.4            | 9.52            | Isoform 2 of ATPase family AAA domain-containing protein 3                                                     |
| IPI:IPI00762897.3 | 1551        | 176.3           | 5.62            | UDP-glucose:glycoprotein glycosyltransferase 1                                                                 |
| IPI:IPI00114641.3 | 526         | 58.3            | 5.91            | 4F2 cell-surface antigen heavy chain                                                                           |
| IPI:IPI00133265.1 | 394         | 44.8            | 7.80            | Ceramide glycosyltransferase                                                                                   |
| IPI:IPI00381611.5 | 756         | 85.3            | 7.68            | A disintegrin and metalloproteinase domain 6-like                                                              |
| IPI:IPI00974712.1 | 2271        | 250.1           | 6.15            | Fn1 protein                                                                                                    |
| IPI:IPI01007978.1 | 1114        | 124.6           | 5.25            | Eukaryotic translation initiation factor 2-alpha kinase 3 precursor                                            |
| IPI:IPI00458077.2 | 756         | 83.5            | 6.86            | Neutral ceramidase                                                                                             |
| IPI:IPI00338793.5 | 954         | 109.3           | 6.55            | Isoform 1 of paired amphipathic helix protein Sin3b                                                            |
| IPI:IPI00608115.1 | 1240        | 138.4           | 9.36            | Isoform 6 of zinc finger protein                                                                               |
| IPI:IPI00974853.1 | 4386        | 498.8           | 5.68            | Plectin isoform Ihj                                                                                            |

AAs, amino acids; MW, molecular weight; *pI*, isoelectric point; ATP, adenosine triphosphate.
