# Supplementary material
Source: PubMed Central journal article supplement (PMC4761832)
Supplement: Supp_Table2.pdf [file Supp_Table2.pdf]

SUPPLEMENTARY TABLE S2. PRIMERS FOR qPCR

| <i>Gene names</i> | <i>Forward primer</i>   | <i>Reverse primer</i>  |
|-------------------|-------------------------|------------------------|
| Sirt3             | TCTATACACAGAACATCGACGGG | AGACCGTGCATGTAGCTGTTA  |
| PGC-1 $\alpha$    | GCTTCTGGGTGGACTCAAGT    | GAGGGCAATCCGTCTTCATCC  |
| ERR $\alpha$      | CTCAGCTCTCTACCCAAACGC   | CCGCTTGGTGATCTCACACTC  |
| SOD2              | CAGACCTGCCTTACGACTATGG  | CTCGGTGGCGTTGAGATTGTT  |
| ATP5b             | TCCTGCCAGAGACTATGCG     | GATGACTGCCACGATTCCG    |
| Mfn1              | ATGGCAGAAACGGTATCTCCA   | GCCCTCAGTAACAAACTCCA   |
| Mfn2              | AGAACTGGACCCGGTTACCA    | CACTTCGCTGATACCCCTGA   |
| Parkin            | GCTCCGAAGGTGTGTCAG      | CGGGCATTGCTCTCAGTCA    |
| Drp1              | CAGGAATTGTTACGGTTCCTAA  | CCTGAATTAACCTGTCCCCTGA |
| Fis1              | AGAGCACGCAATTTGAATATGCC | ATAGTCCCGCTGTTCTCTTT   |
| OPA1              | TGGAAAATGGTTCGAGAGTCAG  | CATCCGTCTCTAGGTTAAAGCG |

qPCR, quantitative real-time polymerase chain reaction.
