# Supplementary material
Source: PubMed Central journal article supplement (PMC4761832)
Supplement: Supp_Table3.pdf [file Supp_Table3.pdf]

SUPPLEMENTARY TABLE S3. CHIP-QPCR PRIMERS OF SIRT3

| <i>ChIP primers</i> | <i>Forward primer</i> | <i>Reverse primer</i> |
|---------------------|-----------------------|-----------------------|
| Primer1             | ACAGCGTCAACTCCCACT    | ATCCGTTTCTTCACATTAGG  |
| Primer2             | GTATGCTATTTCCGGTGCC   | GAAGGCATTGGTTGTGAC    |
| Primer3             | CGAAATAGCATACTTCATACC | GACAATGTCCAGCAGTTAA   |
| Primer4             | GAACAATTACGAATTGCTG   | GAGTTTAACTGCTGGACA    |
| Primer5             | AGCTGGTAAGGCTGGAAC    | AGGGTCAGGGATGTGGAG    |
| Primer6             | TAGCGGAAGTCAAGAACG    | AGTCAGAACCGGCAGGGAT   |
| Primer7             | GTTGCGGTCGTCAAGGTA    | GGTTCAGAGGACCCAAGT    |
| Primer8             | TTGAGTAGGCGGGTGATA    | TGAGGCATTAAGAGTAGAGG  |
| Primer9             | GCCTACTCAAGGAGGTCTG   | TGTTTATGCCTGGTGCTG    |

ChIP, chromatin immunoprecipitation.
